# Supplementary material
Source: publisher site journal article supplement (http://content.karger.com/ProdukteDB/miscArchiv/000/075/726/appendix.pdf)
Supplement: Supplementary file 1 [file appendix.pdf]

## Appendix A. Loci summary

| Locus     | Multiplex | BTA | Relative Position (cM) <sup>a</sup> | Number cattle alleles <sup>a</sup> | Number bison alleles | Bison observed Het % | Bison |                    |
|-----------|-----------|-----|-------------------------------------|------------------------------------|----------------------|----------------------|-------|--------------------|
|           |           |     |                                     |                                    |                      |                      | PIC   | Label <sup>b</sup> |
| AGLA17    | 93        | 1   | 0.0                                 | 4                                  | 1                    | 0                    | 0.00  | HEX                |
| BM6438    | 9         | 1   | 1.6                                 | 6                                  | 5                    | 61                   | 0.52  | HEX                |
| BM6438-29 | 51        | 1   | 1.6                                 | 0                                  | 5                    | 73                   | 0.64  | HEX                |
| TGLA49    | 9         | 1   | 1.9                                 | 7                                  | 1                    | 0                    | 0.00  | HEX                |
| BM8139    | 44        | 1   | 8.2                                 | 7                                  | 2                    | 41                   | 0.32  | HEX                |
| INRA117   | Single    | 1   | 8.4                                 | 5                                  | 4                    | 58                   | 0.47  | TET                |
| BMS574    | 18        | 1   | 14.0                                | 10                                 | 5                    | 56                   | 0.50  | TET                |
| BMS2321   | 21        | 1   | 14.0                                | 10                                 | 4                    | 50                   | 0.43  | TET                |
| BMS4015   | 38        | 1   | 28.2                                | 12                                 | 6                    | 59                   | 0.50  | HEX                |
| BMS4017   | 92        | 1   | 34.8                                | 9                                  | 10                   | 77                   | 0.74  | HEX                |
| BM4307    | 4         | 1   | 35.2                                | 6                                  | 4                    | 47                   | 0.33  | 6FAM               |
| MILSTS080 | 44        | 1   | 39.0                                | 4                                  | 4                    | 59                   | 0.53  | TET                |
| BMS4037   | 36        | 1   | 40.3                                | 8                                  | 7                    | 75                   | 0.65  | HEX                |
| TGLA57    | 7         | 1   | 46.2                                | 8                                  | 6                    | 86                   | 0.73  | 6FAM               |
| RM326     | 35        | 1   | 55.6                                | 8                                  | 7                    | 73                   | 0.66  | TET                |
| BMS527    | 2         | 1   | 55.9                                | 12                                 | 6                    | 77                   | 0.67  | 6FAM               |
| INRA119   | 93        | 1   | 68.7                                | 4                                  | 4                    | 63                   | 0.56  | HEX                |
| BM7145    | 21        | 1   | 69.2                                | 2                                  | 2                    | 36                   | 0.30  | TET                |
| BM6506    | 42        | 1   | 69.2                                | 6                                  | 6                    | 81                   | 0.69  | HEX                |
| BMS4008   | 11        | 1   | 71.7                                | 10                                 | 3                    | 47                   | 0.35  | 6FAM               |
| BMS4023   | 43        | 1   | 75.0                                | 2                                  | 3                    | 36                   | 0.31  | HEX                |
| BMS4031   | 14        | 1   | 77.7                                | 10                                 | 6                    | 75                   | 0.73  | HEX                |
| BM864     | 45        | 1   | 88.2                                | 14                                 | 4                    | 39                   | 0.45  | TET                |
| BMS4028   | 44        | 1   | 95.6                                | 12                                 | 2                    | 3                    | 0.03  | 6FAM               |
| BMS4040   | 16        | 1   | 98.8                                | 10                                 | 1                    | 0                    | 0.00  | TET                |
| BMS4019   | 92        | 1   | 98.8                                | 2                                  | 4                    | 23                   | 0.22  | HEX                |
| BMS1789   | 45        | 1   | 100.9                               | 11                                 | 2                    | 3                    | 0.03  | TET                |
| BM1824    | 12        | 1   | 108.6                               | 6                                  | 8                    | 77                   | 0.74  | 6FAM               |
| BMS599    | 45        | 1   | 125.8                               | 14                                 | 7                    | 72                   | 0.78  | 6FAM               |
| PIT16b6   | Single    | 1   | -                                   | 0                                  | 2                    | 6                    | 0.06  | HEX                |
| PIT17b7   | Single    | 1   | -                                   | 0                                  | 9                    | 75                   | 0.72  | HEX                |
| TGLA44    | 48        | 2   | 0.8                                 | 16                                 | 5                    | 63                   | 0.53  | TET                |
| INRA040   | 49        | 2   | 7.5                                 | 36                                 | 9                    | 71                   | 0.77  | HEX                |
| TEXAN2    | 31        | 2   | 22.5                                | 9                                  | 6                    | 69                   | 0.54  | HEX                |
| URB042    | 50        | 2   | 33.9                                | 10                                 | 1                    | 0                    | 0.00  | TET                |
| CSSM42    | 22        | 2   | 34.4                                | 11                                 | 3                    | 59                   | 0.53  | HEX                |
| ETH121    | 22        | 2   | 34.4                                | 12                                 | 5                    | 73                   | 0.62  | 6FAM               |
| ILSTS030  | 57        | 2   | 35.3                                | 5                                  | 2                    | 50                   | 0.34  | HEX                |
| BMS803    | 21        | 2   | 41.0                                | 11                                 | 2                    | 38                   | 0.34  | HEX                |
| BM4440    | 3         | 2   | 55.0                                | 11                                 | 6                    | 77                   | 0.74  | TET                |
| BMS2024   | 34        | 2   | 55.0                                | 9                                  | 9                    | 79                   | 0.81  | TET                |
| BM2808    | 46        | 2   | 59.9                                | 6                                  | 7                    | 71                   | 0.71  | 6FAM               |
| ILSTS050  | 57        | 2   | 61.3                                | 5                                  | 8                    | 81                   | 0.70  | 6FAM               |
| BMS2      | 21        | 2   | 61.6                                | 2                                  | 1                    | 0                    | 0.00  | 6FAM               |
| BMS353    | 52        | 2   | 63.0                                | 7                                  | 6                    | 80                   | 0.76  | HEX                |
| RM041     | 47        | 2   | 69.0                                | 7                                  | 6                    | 64                   | 0.63  | HEX                |
| ARO28     | 49        | 2   | 87.8                                | 7                                  | 6                    | 75                   | 0.66  | TET                |
| BM6444    | 43        | 2   | 88.4                                | 5                                  | 6                    | 63                   | 0.60  | HEX                |
| BM1223    | 38        | 2   | 92.1                                | 6                                  | 8                    | 61                   | 0.56  | TET                |

|          |        |   |       |    |    |    |       |      |
|----------|--------|---|-------|----|----|----|-------|------|
| BMS2267  | 113    | 2 | 100.0 | 7  | 6  | 57 | 0.66  | 6FAM |
| BMS356   | 113    | 2 | 100.3 | 5  | 2  | 13 | 0.11  | NED  |
| BM4117   | 113    | 2 | 100.9 | 5  | 4  | 70 | 0.61  | HEX  |
| BMS2519  | 113    | 2 | 101.5 | 12 | 3  | 25 | 0.29  | HEX  |
| BM2113   | 2      | 2 | 106.2 | 11 | 7  | 78 | 0.74  | 6FAM |
| OARFCB11 | Single | 2 | 120.4 | 14 | 6  | 60 | 0.584 | NED  |
| INRA006  | 28     | 3 | 19.5  | 8  | 3  | 35 | 0.27  | TET  |
| BMS2904  | 33     | 3 | 28.3  | 5  | 5  | 59 | 0.48  | HEX  |
| RM065    | 47     | 3 | 32.1  | 5  | 6  | 71 | 0.71  | 6FAM |
| CSSM54   | 46     | 3 | 33.7  | 3  | 1  | 0  | 0.00  | HEX  |
| BMS963   | 40     | 3 | 35.6  | 8  | 7  | 61 | 0.66  | 6FAM |
| BM723    | 40     | 3 | 47.3  | 9  | 4  | 66 | 0.55  | HEX  |
| RM3      | 48     | 3 | 47.3  | 2  | 4  | 30 | 0.28  | HEX  |
| BM4129   | 32     | 3 | 52.3  | 9  | 2  | 2  | 0.02  | 6FAM |
| INRA003  | 31     | 3 | 59.5  | 10 | 8  | 45 | 0.73  | HEX  |
| HUJ246   | 11     | 3 | 67.9  | 6  | 5  | 78 | 0.68  | TET  |
| HUJII77  | 27     | 3 | 87.4  | 11 | 1  | 0  | 0.00  | TET  |
| BMS2145  | 50     | 3 | 93.9  | 7  | 5  | 67 | 0.57  | TET  |
| BM7225   | 46     | 3 | 102.4 | 8  | 7  | 77 | 0.81  | HEX  |
| BMS896   | 46     | 3 | 114.9 | 7  | 4  | 62 | 0.59  | 6FAM |
| BMC4214  | 19     | 3 | 123.0 | 13 | 5  | 70 | 0.71  | HEX  |
| BMC1410  | 6      | 4 | 0.0   | 11 | 1  | 0  | 0.00  | TET  |
| BMS1788  | 38     | 4 | 8.4   | 12 | 5  | 58 | 0.54  | TET  |
| BMS827   | 13     | 4 | 24.7  | 10 | 2  | 52 | 0.35  | HEX  |
| BMS1172  | 1      | 4 | 27.3  | 9  | 6  | 78 | 0.69  | 6FAM |
| BMS1237  | 47     | 4 | 30.6  | 26 | 7  | 79 | 0.67  | TET  |
| BMS1840  | 47     | 4 | 41.7  | 8  | 3  | 39 | 0.34  | 6FAM |
| BMS2172  | 24     | 4 | 49.6  | 9  | 4  | 69 | 0.68  | 6FAM |
| INRA072  | 47     | 4 | 59.3  | 12 | 6  | 71 | 0.67  | HEX  |
| BMS2571  | 34     | 4 | 66.3  | 7  | 6  | 60 | 0.60  | TET  |
| BMS2809  | 11     | 4 | 72.0  | 10 | 2  | 5  | 0.05  | HEX  |
| BMS1074  | 42     | 4 | 74.9  | 5  | 4  | 75 | 0.69  | HEX  |
| LEP      | 126    | 4 | 82.8  | 5  | 6  | 77 | 0.71  | 6FAM |
| BMS648   | Single | 4 | 87.4  | 6  | 2  | 14 | 0.15  | TET  |
| RM088    | 55     | 4 | 94.8  | 10 | 2  | 44 | 0.36  | TET  |
| TCRB     | 43     | 4 | 97.2  | 2  | 3  | 44 | 0.36  | HEX  |
| BMS1095  | 19     | 5 | 0.0   | 13 | 2  | 43 | 0.31  | 6FAM |
| BM6026   | 112    | 5 | 6.7   | 10 | 2  | 0  | 0.06  | 6FAM |
| BMS610   | 18     | 5 | 12.8  | 12 | 4  | 53 | 0.41  | HEX  |
| RM103    | 91     | 5 | 28.6  | 10 | 3  | 23 | 0.19  | TET  |
| BMS1315  | 22     | 5 | 31.8  | 7  | 5  | 56 | 0.49  | HEX  |
| BMC1009  | 16     | 5 | 40.0  | 11 | 4  | 61 | 0.40  | HEX  |
| CSSM34   | 56     | 5 | 44.4  | 9  | 8  | 83 | 0.78  | 6FAM |
| BL37     | 100    | 5 | 50.2  | 10 | 4  | 66 | 0.63  | TET  |
| RM500    | 8      | 5 | 55.6  | 4  | 1  | 0  | 0.00  | 6FAM |
| BR2936   | 132    | 5 | 64.3  | 8  | 6  | 60 | 0.55  | TET  |
| CSSM22   | 17     | 5 | 71.1  | 9  | 6  | 64 | 0.62  | TET  |
| IGF1     | 51     | 5 | 74.0  | 4  | 5  | 61 | 0.50  | TET  |
| BMS1248  | 105    | 5 | 87.0  | 14 | 3  | 59 | 0.51  | 6FAM |
| BMS1658  | 111    | 5 | 102.0 | 10 | 6  | 64 | 0.69  | 6FAM |
| BM2830   | 132    | 5 | 113.5 | 19 | 10 | 90 | 0.82  | NED  |
| BM49     | 108    | 5 | 115.0 | 11 | 4  | 36 | 0.35  | HEX  |
| ETH152   | 104    | 5 | 118.3 | 7  | 6  | 83 | 0.74  | 6FAM |
| INRA133  | 27     | 6 | 8.2   | 6  | 6  | 58 | 0.67  | HEX  |
| BM1329   | 38     | 6 | 35.5  | 8  | 5  | 72 | 0.61  | 6FAM |
| BMS2508  | 31     | 6 | 44.2  | 9  | 2  | 36 | 0.30  | 6FAM |

|          |     |    |       |    |    |    |      |      |
|----------|-----|----|-------|----|----|----|------|------|
| BMS382   | 131 | 6  | 49.7  | 7  | 2  | 17 | 0.17 | 6FAM |
| BMS1242  | 131 | 6  | 50.1  | 10 | 2  | 2  | 0.05 | 6FAM |
| BMS690   | 131 | 6  | 51.9  | 7  | 5  | 46 | 0.38 | 6FAM |
| BMS518   | 106 | 6  | 55.2  | 6  | 6  | 70 | 0.59 | HEX  |
| BMS360   | 12  | 6  | 66.5  | 11 | 6  | 75 | 0.71 | 6FAM |
| BM4621   | 34  | 6  | 72.3  | 6  | 5  | 48 | 0.48 | 6FAM |
| ILSTS035 | 18  | 6  | 81.0  | 18 | 3  | 48 | 0.37 | 6FAM |
| CSN3     | 21  | 6  | 82.6  | 5  | 2  | 38 | 0.27 | 6FAM |
| BMS2460  | 26  | 6  | 86.2  | 7  | 4  | 42 | 0.39 | 6FAM |
| BM4311   | 10  | 6  | 89.7  | 7  | 4  | 50 | 0.62 | 6FAM |
| ILSTS018 | 127 | 6  | 89.8  | 3  | 3  | 51 | 0.34 | 6FAM |
| BM8124   | 13  | 6  | 94.2  | 11 | 5  | 75 | 0.70 | 6FAM |
| BMC4203  | 55  | 6  | 112.9 | 8  | 6  | 69 | 0.65 | 6FAM |
| BM7160   | 106 | 7  | 0.0   | 8  | 4  | 44 | 0.41 | TET  |
| BMS713   | 110 | 7  | 15.2  | 10 | 6  | 58 | 0.47 | HEX  |
| BM2607   | 22  | 7  | 29.1  | 3  | 4  | 9  | 0.09 | 6FAM |
| BMS1116  | 5   | 7  | 30.5  | 5  | 3  | 30 | 0.23 | 6FAM |
| IL4      | 14  | 7  | 30.5  | 9  | 9  | 81 | 0.85 | 6FAM |
| BM6105   | 105 | 7  | 35.7  | 10 | 3  | 52 | 0.42 | 6FAM |
| BMS2258  | 12  | 7  | 75.0  | 11 | 8  | 78 | 0.79 | HEX  |
| BM1853   | 40  | 7  | 85.3  | 5  | 2  | 59 | 0.37 | 6FAM |
| BM9065   | 101 | 7  | 102.4 | 7  | 5  | 64 | 0.60 | TET  |
| BMS1979  | 12  | 7  | 124.4 | 11 | 4  | 67 | 0.57 | TET  |
| BL1043   | 107 | 7  | 134.1 | 14 | 1  | 0  | 0.00 | 6FAM |
| BMS1864  | 123 | 8  | 0.0   | 6  | 2  | 14 | 0.12 | 6FAM |
| RM372    | 1   | 8  | 19.1  | 10 | 8  | 80 | 0.78 | HEX  |
| BP2      | 29  | 8  | 26.3  | 8  | 2  | 11 | 0.10 | TET  |
| BMS678   | 106 | 8  | 38.4  | 10 | 5  | 22 | 0.22 | HEX  |
| BM4006   | 102 | 8  | 47.1  | 9  | 5  | 53 | 0.46 | 6FAM |
| INRA122  | 100 | 8  | 51.9  | 6  | 3  | 50 | 0.36 | TET  |
| BMS2072  | 24  | 8  | 58.8  | 9  | 5  | 68 | 0.70 | HEX  |
| IDVGA52  | 25  | 8  | 75.0  | 14 | 6  | 67 | 0.64 | HEX  |
| BM3412   | 100 | 8  | 78.6  | 10 | 5  | 67 | 0.68 | HEX  |
| BM711    | 35  | 8  | 83.6  | 9  | 5  | 53 | 0.47 | 6FAM |
| BMS2847  | 105 | 8  | 112.2 | 10 | 7  | 83 | 0.76 | HEX  |
| BM757    | 17  | 9  | 0.6   | 10 | 6  | 56 | 0.51 | HEX  |
| BMS47    | 30  | 9  | 4.9   | 8  | 7  | 56 | 0.58 | 6FAM |
| ETH225   | 58  | 9  | 8.1   | 10 | 5  | 47 | 0.52 | TET  |
| BM2504   | 107 | 9  | 25.2  | 7  | 11 | 86 | 0.81 | TET  |
| BMS817   | 108 | 9  | 38.0  | 9  | 3  | 33 | 0.28 | 6FAM |
| BMS555   | 5   | 9  | 39.1  | 10 | 2  | 38 | 0.35 | 6FAM |
| BMS434   | 11  | 9  | 51.6  | 10 | 3  | 35 | 0.36 | TET  |
| BMC701   | 15  | 9  | 56.7  | 12 | 4  | 76 | 0.64 | HEX  |
| BMS2377  | 105 | 9  | 63.8  | 6  | 5  | 61 | 0.44 | TET  |
| BMS1724  | 26  | 9  | 74.1  | 7  | 1  | 0  | 0.00 | TET  |
| BM4208   | 111 | 9  | 84.6  | 7  | 1  | 0  | 0.00 | HEX  |
| BMS2295  | 21  | 9  | 91.5  | 10 | 6  | 64 | 0.61 | 6FAM |
| BMS1967  | 14  | 9  | 102.5 | 12 | 5  | 22 | 0.27 | TET  |
| BMS528   | 18  | 10 | 19.0  | 12 | 5  | 78 | 0.59 | 6FAM |
| BMS2349  | 16  | 10 | 22.1  | 15 | 3  | 22 | 0.25 | 6FAM |
| SPS113   | 19  | 10 | 29.2  | 0  | 3  | 50 | 0.37 | HEX  |
| BRN      | 101 | 10 | 29.2  | 14 | 3  | 50 | 0.37 | HEX  |
| BMS2742  | 109 | 10 | 38.5  | 14 | 7  | 72 | 0.69 | HEX  |
| BM875    | 101 | 10 | 46.5  | 7  | 6  | 81 | 0.77 | HEX  |
| BMS419   | 15  | 10 | 51.1  | 15 | 7  | 75 | 0.66 | HEX  |
| INRA071  | 101 | 10 | 59.3  | 12 | 5  | 75 | 0.72 | 6FAM |

|          |        |    |       |    |    |    |      |      |
|----------|--------|----|-------|----|----|----|------|------|
| INRA037  | 26     | 10 | 69.9  | 15 | 6  | 75 | 0.69 | 6FAM |
| BMS1318  | Single | 10 | 73.1  | 8  | 8  | 77 | 0.78 | TET  |
| BMS614   | 14     | 10 | 89.5  | 12 | 3  | 29 | 0.27 | TET  |
| CSSM46   | 7      | 10 | 92.9  | 13 | 2  | 20 | 0.16 | TET  |
| BMS2614  | 6      | 10 | 98.4  | 8  | 9  | 81 | 0.80 | TET  |
| BM9067   | 120    | 11 | 9.5   | 17 | 7  | 58 | 0.50 | TET  |
| BMS2325  | 101    | 11 | 11.7  | 6  | 10 | 83 | 0.76 | TET  |
| RM096    | 101    | 11 | 31.3  | 9  | 2  | 3  | 0.03 | 6FAM |
| BM7169   | 15     | 11 | 41.0  | 13 | 2  | 39 | 0.37 | 6FAM |
| BMS1716  | 11     | 11 | 47.7  | 10 | 5  | 67 | 0.61 | HEX  |
| ILSTS036 | 29     | 11 | 56.9  | 9  | 3  | 24 | 0.20 | HEX  |
| RM150    | 32     | 11 | 65.5  | 14 | 1  | 0  | 0.00 | HEX  |
| BM8118   | 124    | 11 | 72.4  | 9  | 8  | 86 | 0.80 | HEX  |
| BMS2047  | 14     | 11 | 73.8  | 20 | 2  | 33 | 0.28 | 6FAM |
| BM9146   | 92     | 11 | 74.1  | 3  | 3  | 58 | 0.53 | 6FAM |
| IDVGA3   | 101    | 11 | 76.9  | 10 | 1  | 0  | 0.00 | HEX  |
| BL1103   | 27     | 11 | 90.9  | 12 | 2  | 9  | 0.11 | TET  |
| BMS460   | 4      | 11 | 102.6 | 10 | 3  | 52 | 0.44 | HEX  |
| ILSTS045 | 38     | 11 | 106.4 | 8  | 3  | 53 | 0.42 | HEX  |
| BMS410   | 1      | 12 | 0.0   | 15 | 7  | 67 | 0.58 | TET  |
| BMS2252  | 100    | 12 | 15.1  | 12 | 8  | 75 | 0.67 | 6FAM |
| BMS2057  | 106    | 12 | 20.7  | 12 | 5  | 38 | 0.37 | TET  |
| RM094    | 55     | 12 | 41.7  | 9  | 3  | 41 | 0.34 | HEX  |
| BMS975   | 32     | 12 | 61.2  | 8  | 5  | 66 | 0.63 | HEX  |
| BMS585   | 7      | 12 | 79.7  | 4  | 3  | 50 | 0.46 | HEX  |
| BM4028   | 18     | 12 | 79.7  | 13 | 4  | 80 | 0.63 | 6FAM |
| INRA5    | 130    | 12 | 83.1  | 4  | 4  | 49 | 0.47 | HEX  |
| BMS1316  | 103    | 12 | 98.7  | 14 | 1  | 0  | 0.00 | TET  |
| BMS2724  | 100    | 12 | 105.8 | 8  | 6  | 72 | 0.70 | TET  |
| BMC1222  | 124    | 13 | 19.5  | 14 | 4  | 21 | 0.24 | 6FAM |
| BMS1352  | 102    | 13 | 31.1  | 8  | 8  | 80 | 0.81 | TET  |
| BM720    | 3      | 13 | 38.6  | 14 | 7  | 71 | 0.68 | TET  |
| HUJ616   | 104    | 13 | 43.8  | 8  | 8  | 71 | 0.68 | 6FAM |
| BM9248   | 6      | 13 | 52.8  | 13 | 5  | 52 | 0.55 | TET  |
| RM327    | 102    | 13 | 62.1  | 12 | 5  | 52 | 0.56 | HEX  |
| BL1071   | 109    | 13 | 68.6  | 9  | 11 | 81 | 0.84 | HEX  |
| AGLA232  | 25     | 13 | 79.5  | 15 | 6  | 66 | 0.62 | TET  |
| BMS2319  | 55     | 13 | 85.3  | 7  | 6  | 66 | 0.57 | HEX  |
| BMS1747  | 36     | 14 | 4.2   | 9  | 4  | 67 | 0.56 | 6FAM |
| RM011    | 122    | 14 | 27.7  | 12 | 5  | 80 | 0.72 | HEX  |
| ILSTS008 | 19     | 14 | 35.2  | 2  | 3  | 30 | 0.27 | TET  |
| BMC1207  | 102    | 14 | 36.2  | 10 | 2  | 5  | 0.05 | TET  |
| BL1029   | 122    | 14 | 42.8  | 13 | 2  | 52 | 0.35 | TET  |
| BMS108   | 107    | 14 | 50.8  | 10 | 4  | 33 | 0.29 | TET  |
| BMS947   | 9      | 14 | 52.8  | 12 | 4  | 45 | 0.48 | TET  |
| BM4513   | 9      | 14 | 62.5  | 10 | 2  | 23 | 0.20 | 6FAM |
| RM66     | 109    | 14 | 65.3  | 3  | 5  | 50 | 0.51 | TET  |
| BM2934   | 13     | 14 | 66.4  | 8  | 2  | 52 | 0.36 | 6FAM |
| BL1036   | 30     | 14 | 78.7  | 10 | 5  | 70 | 0.68 | TET  |
| BMS2055  | 19     | 14 | 84.1  | 10 | 1  | 0  | 0.00 | 6FAM |
| BMS2533  | 10     | 15 | 5.2   | 16 | 2  | 50 | 0.37 | 6FAM |
| BMS1004  | 20     | 15 | 7.2   | 11 | 3  | 20 | 0.17 | HEX  |
| ADCY2    | 102    | 15 | 12.1  | 9  | 5  | 77 | 0.65 | HEX  |
| JAB8     | 114    | 15 | 20.8  | 9  | 5  | 70 | 0.67 | 6FAM |
| HEL1     | 106    | 15 | 27.7  | 8  | 4  | 63 | 0.61 | 6FAM |
| BMS2684  | 16     | 15 | 34.9  | 13 | 1  | 0  | 0.00 | HEX  |

|          |        |    |      |    |    |    |      |      |
|----------|--------|----|------|----|----|----|------|------|
| PTH      | 126    | 15 | 34.9 | 2  | 1  | 0  | 0.00 | HEX  |
| BM4325   | 128    | 15 | 59.9 | 6  | 8  | 63 | 0.67 | TET  |
| BMS812   | 108    | 15 | 68.8 | 14 | 6  | 83 | 0.68 | TET  |
| BMS2076  | 56     | 15 | 75.4 | 7  | 4  | 20 | 0.17 | HEX  |
| BMS820   | 14     | 15 | 81.6 | 15 | 2  | 31 | 0.23 | HEX  |
| BMS429   | 104    | 15 | 93.4 | 9  | 3  | 31 | 0.26 | TET  |
| BMS1348  | 110    | 16 | 12.8 | 7  | 7  | 75 | 0.76 | HEX  |
| BM121    | 17     | 16 | 24.4 | 19 | 5  | 43 | 0.43 | TET  |
| TGLA53   | 52     | 16 | 40.6 | 13 | 6  | 55 | 0.57 | 6FAM |
| BR6504   | Single | 16 | 51.2 | 10 | 5  | 75 | 0.62 | TET  |
| IDVGA49  | 108    | 16 | 56.5 | 9  | 4  | 42 | 0.36 | TET  |
| INRA048  | 105    | 16 | 73.0 | 15 | 1  | 0  | 0.00 | 6FAM |
| BM1706   | 3      | 16 | 80.6 | 10 | 6  | 55 | 0.52 | 6FAM |
| BM3509   | 26     | 16 | 84.5 | 29 | 6  | 70 | 0.67 | HEX  |
| BMS1825  | 130    | 17 | 3.8  | 18 | 4  | 3  | 0.06 | 6FAM |
| OARVH98  | 114    | 17 | 12.8 | 11 | 4  | 71 | 0.59 | TET  |
| BMS941   | 4      | 17 | 30.1 | 13 | 3  | 55 | 0.52 | TET  |
| BM305    | 127    | 17 | 51.9 | 18 | 10 | 59 | 0.61 | 6FAM |
| BMS1167  | 128    | 17 | 64.7 | 7  | 4  | 58 | 0.48 | 6FAM |
| BM8125   | 112    | 17 | 73.9 | 7  | 1  | 0  | 0.00 | HEX  |
| BM1862   | 23     | 17 | 86.3 | 16 | 6  | 80 | 0.72 | 6FAM |
| BM1233   | 102    | 17 | 98.6 | 8  | 6  | 56 | 0.54 | HEX  |
| BMS1355  | 31     | 18 | 2.8  | 9  | 4  | 66 | 0.62 | TET  |
| BMS1322  | 25     | 18 | 13.8 | 6  | 3  | 40 | 0.32 | HEX  |
| BMS2213  | 16     | 18 | 26.2 | 11 | 2  | 25 | 0.25 | 6FAM |
| BM7109   | 101    | 18 | 49.6 | 6  | 3  | 41 | 0.44 | 6FAM |
| BMS2639  | 1      | 18 | 57.0 | 13 | 6  | 84 | 0.76 | 6FAM |
| BM2078   | 20     | 18 | 77.8 | 11 | 1  | 0  | 0.00 | 6FAM |
| BM6507   | 11     | 18 | 78.9 | 7  | 3  | 63 | 0.56 | TET  |
| TGLA227  | 8      | 18 | 84.7 | 13 | 1  | 0  | 0.00 | HEX  |
| BM9202   | 109    | 19 | 0.0  | 10 | 7  | 76 | 0.69 | 6FAM |
| BMS745   | 40     | 19 | 15.9 | 7  | 7  | 79 | 0.75 | TET  |
| BMS2142  | 11     | 19 | 44.7 | 13 | 8  | 70 | 0.62 | HEX  |
| BMS650   | 56     | 19 | 56.5 | 15 | 7  | 53 | 0.45 | 6FAM |
| BM17132  | 2      | 19 | 58.6 | 10 | 4  | 66 | 0.63 | 6FAM |
| CSSM65   | 58     | 19 | 65.7 | 9  | 11 | 74 | 0.74 | HEX  |
| RM186    | 120    | 19 | 66.1 | 2  | 4  | 59 | 0.44 | HEX  |
| BMS1069  | 122    | 19 | 72.0 | 6  | 7  | 74 | 0.74 | TET  |
| RM388    | 120    | 19 | 85.9 | 7  | 4  | 67 | 0.64 | 6FAM |
| BMS601   | 31     | 19 | 99.5 | 8  | 5  | 67 | 0.72 | 6FAM |
| BM3517   | 13     | 20 | 0.0  | 10 | 7  | 73 | 0.69 | TET  |
| BM1225   | 4      | 20 | 8.0  | 11 | 9  | 69 | 0.64 | 6FAM |
| BMS1282  | 107    | 20 | 19.1 | 9  | 3  | 48 | 0.48 | HEX  |
| BMS2461  | 111    | 20 | 31.2 | 9  | 3  | 56 | 0.39 | TET  |
| BMS1128  | 5      | 20 | 33.9 | 8  | 3  | 45 | 0.36 | 6FAM |
| BMS2361  | 106    | 20 | 45.5 | 7  | 5  | 81 | 0.69 | HEX  |
| AGLA29   | 9      | 20 | 50.6 | 9  | 3  | 30 | 0.24 | HEX  |
| BM4107   | 21     | 20 | 52.4 | 10 | 7  | 78 | 0.69 | HEX  |
| ANP1     | 107    | 20 | 52.6 | 5  | 3  | 42 | 0.36 | HEX  |
| BM8115   | 128    | 21 | 0.0  | 12 | 6  | 80 | 0.77 | HEX  |
| BMS1117  | 1      | 21 | 9.9  | 9  | 5  | 80 | 0.63 | HEX  |
| RM151    | 111    | 21 | 11.7 | 13 | 1  | 0  | 0.00 | HEX  |
| ILSTS095 | 24     | 21 | 24.4 | 6  | 10 | 81 | 0.71 | 6FAM |
| BM103    | 29     | 21 | 30.5 | 10 | 5  | 36 | 0.35 | TET  |
| BMS2557  | 110    | 21 | 38.6 | 5  | 4  | 16 | 0.30 | 6FAM |
| BMS868   | 127    | 21 | 47.9 | 11 | 10 | 72 | 0.70 | TET  |

|            |        |    |      |    |    |    |      |      |
|------------|--------|----|------|----|----|----|------|------|
| TGLA337    | 112    | 21 | 56.3 | 12 | 4  | 38 | 0.41 | 6FAM |
| CSSM26     | 58     | 22 | 0.0  | 14 | 3  | 25 | 0.23 | 6FAM |
| BM1558     | 58     | 22 | 173  | 4  | 3  | 25 | 0.26 | HEX  |
| BMS742     | 4      | 22 | 18.0 | 6  | 2  | 15 | 0.13 | HEX  |
| INRA194    | 18     | 22 | 21.8 | 5  | 5  | 58 | 0.56 | HEX  |
| AGLA13     | Single | 22 | 29.4 | 8  | 5  | 72 | 0.67 | 6FAM |
| BMS2573    | 5      | 22 | 40.4 | 10 | 4  | 14 | 0.13 | 6FAM |
| BM3628     | 103    | 22 | 44.5 | 8  | 12 | 77 | 0.73 | 6FAM |
| BMS875     | 103    | 22 | 61.1 | 5  | 5  | 70 | 0.69 | 6FAM |
| BM4102     | 24     | 22 | 81.1 | 9  | 3  | 19 | 0.16 | 6FAM |
| BM47       | 23     | 23 | 9.1  | 17 | 3  | 53 | 0.44 | 6FAM |
| UWCA1      | 120    | 23 | 22.1 | 11 | 6  | 66 | 0.59 | 6FAM |
| BOLADRB2   | 126    | 23 | 33.3 | 3  | 1  | 0  | 0.00 | HEX  |
| BOLADRB1   | 126    | 23 | 35.4 | 10 | 7  | 83 | 0.79 | TET  |
| BMS468     | 35     | 23 | 36.0 | 4  | 3  | 41 | 0.37 | TET  |
| CYP21      | 103    | 23 | 36.0 | 11 | 3  | 23 | 0.19 | HEX  |
| PRL2       | 43     | 23 | 43.2 | 0  | 2  | 6  | 0.06 | 6FAM |
| RM185      | 19     | 23 | 45.1 | 8  | 2  | 9  | 0.09 | HEX  |
| BM7233     | 42     | 23 | 49.1 | 11 | 6  | 38 | 0.39 | 6FAM |
| BM1818     | 24     | 23 | 50.9 | 8  | 4  | 20 | 0.21 | HEX  |
| BMS2269    | 12     | 23 | 60.8 | 10 | 7  | 69 | 0.60 | 6FAM |
| BM1905     | 3      | 23 | 64.3 | 11 | 5  | 60 | 0.54 | TET  |
| BM1443     | 109    | 23 | 67.1 | 10 | 4  | 58 | 0.51 | 6FAM |
| BMS2526    | 108    | 24 | 6.0  | 11 | 3  | 44 | 0.39 | HEX  |
| BM7228     | 23     | 24 | 173  | 6  | 9  | 73 | 0.79 | HEX  |
| BMS2270    | 11     | 24 | 21.2 | 14 | 3  | 52 | 0.44 | 6FAM |
| ILSTS065   | 91     | 24 | 25.2 | 7  | 0  | 0  | 0.00 | HEX  |
| CSSM31     | 127    | 24 | 25.2 | 4  | 7  | 70 | 0.70 | HEX  |
| AGLA269    | 107    | 24 | 27.6 | 17 | 9  | 69 | 0.66 | 6FAM |
| BMS1862    | 1      | 24 | 32.8 | 10 | 9  | 86 | 0.84 | HEX  |
| BMS1743    | 17     | 24 | 40.7 | 17 | 6  | 70 | 0.63 | 6FAM |
| BMS3005    | 6      | 24 | 46.1 | 2  | 2  | 3  | 0.03 | TET  |
| BMS466     | 17     | 24 | 46.1 | 10 | 14 | 78 | 0.71 | HEX  |
| RM338      | 130    | 24 | 46.8 | 8  | 10 | 75 | 0.70 | TET  |
| INRA090    | 133    | 24 | 53.2 | 5  | 4  | 52 | 0.48 | 6FAM |
| BMS2034    | 133    | 24 | 57.4 | 4  | 12 | 81 | 0.75 | 6FAM |
| BMS1926    | 104    | 24 | 57.4 | 9  | 3  | 8  | 0.09 | HEX  |
| BMS3024    | 35     | 24 | 62.5 | 12 | 2  | 42 | 0.34 | 6FAM |
| ILSTS102   | 23     | 25 | 6.5  | 9  | 5  | 66 | 0.61 | TET  |
| BMS130     | 15     | 25 | 12.3 | 10 | 3  | 9  | 0.08 | TET  |
| BM4005     | 33     | 25 | 12.3 | 11 | 2  | 2  | 0.02 | TET  |
| RM404      | 103    | 25 | 15.2 | 7  | 6  | 65 | 0.70 | 6FAM |
| BM737      | 23     | 25 | 27.8 | 11 | 5  | 64 | 0.61 | TET  |
| BMS1353    | 20     | 25 | 45.3 | 15 | 5  | 67 | 0.65 | HEX  |
| AF5(L6038) | 123    | 25 | 60.6 | 11 | 7  | 73 | 0.72 | TET  |
| BMS651     | 94     | 26 | 2.5  | 12 | 5  | 53 | 0.53 | TET  |
| HEL11      | 94     | 26 | 20.7 | 13 | 12 | 68 | 0.76 | 6FAM |
| BM1314     | 93     | 26 | 24.8 | 7  | 1  | 0  | 0.00 | 6FAM |
| BM188      | 30     | 26 | 40.4 | 11 | 8  | 73 | 0.67 | HEX  |
| BMS2567    | 103    | 26 | 50.0 | 8  | 2  | 9  | 0.11 | HEX  |
| BM804      | 112    | 26 | 59.6 | 8  | 4  | 58 | 0.52 | HEX  |
| BM3507     | 4      | 27 | 0.0  | 14 | 6  | 59 | 0.73 | TET  |
| BMS1001    | 32     | 27 | 5.1  | 9  | 6  | 56 | 0.55 | TET  |
| BMS2137    | 25     | 27 | 19.3 | 6  | 3  | 54 | 0.37 | TET  |
| CSSM43     | 18     | 27 | 34.1 | 9  | 4  | 58 | 0.57 | HEX  |
| CSSM36     | 5      | 27 | 39.8 | 7  | 1  | 0  | 0.00 | HEX  |

|         |        |    |       |    |   |    |      |      |
|---------|--------|----|-------|----|---|----|------|------|
| INRA134 | 112    | 27 | 45.5  | 12 | 1 | 0  | 0.00 | TET  |
| BMS2116 | 104    | 27 | 55.4  | 9  | 6 | 47 | 0.54 | 6FAM |
| BMS1675 | 17     | 27 | 64.1  | 10 | 4 | 44 | 0.43 | 6FAM |
| BMC6020 | 105    | 28 | 2.5   | 18 | 9 | 69 | 0.72 | TET  |
| IDVGA29 | 34     | 28 | 8.7   | 7  | 9 | 80 | 0.71 | HEX  |
| BL25    | 28     | 28 | 17.8  | 6  | 2 | 2  | 0.02 | 6FAM |
| BMS510  | 2      | 28 | 22.1  | 13 | 4 | 75 | 0.69 | HEX  |
| BMS2608 | 107    | 28 | 32.0  | 9  | 3 | 9  | 0.09 | 6FAM |
| BM6466  | 122    | 28 | 35.8  | 14 | 3 | 16 | 0.14 | 6FAM |
| BMS1714 | 109    | 28 | 42.1  | 9  | 7 | 72 | 0.64 | TET  |
| BM4602  | 7      | 29 | 0.0   | 12 | 4 | 26 | 0.24 | 6FAM |
| BMS1857 | 20     | 29 | 0.9   | 15 | 9 | 89 | 0.79 | 6FAM |
| BMS1244 | 105    | 29 | 1.5   | 11 | 5 | 33 | 0.35 | HEX  |
| BMS764  | Single | 29 | 9.7   | 8  | 7 | 78 | 0.77 | 6FAM |
| BMS1787 | 56     | 29 | 18.5  | 15 | 7 | 75 | 0.67 | TET  |
| RM044   | 33     | 29 | 23.3  | 10 | 7 | 76 | 0.70 | 6FAM |
| BMS1600 | 105    | 29 | 28.4  | 6  | 5 | 72 | 0.57 | HEX  |
| OCAM    | 17     | 29 | 39.9  | 3  | 3 | 38 | 0.38 | 6FAM |
| RM040   | 103    | 29 | 39.9  | 5  | 2 | 14 | 0.12 | HEX  |
| BMC3224 | 52     | 29 | 43.6  | 4  | 2 | 2  | 0.02 | HEX  |
| BL1100  | 103    | 29 | 46.6  | 10 | 7 | 62 | 0.63 | HEX  |
| URB011  | 33     | 29 | 55.6  | 7  | 8 | 84 | 0.75 | 6FAM |
| BMS1948 | 107    | 29 | 61.6  | 12 | 2 | 38 | 0.27 | HEX  |
| BM6017  | 10     | X  | 4.7   | 14 | 5 | 64 | 0.74 | HEX  |
| BMS903  | 5      | X  | 12.1  | 13 | 6 | 83 | 0.69 | HEX  |
| INRA120 | 16     | X  | 128.5 | 8  | 4 | 69 | 0.51 | TET  |
| XBM38   | 22     | X  | 128.6 | 5  | 4 | 57 | 0.65 | TET  |
| MCM74   | 42     | X  | 128.6 | 7  | 3 | 40 | 0.34 | 6FAM |
| BMS911  | 42     | X  | 136.2 | 9  | 5 | 70 | 0.66 | HEX  |

<sup>a</sup> Taken from USDA/MARC database

<sup>b</sup> ABI fluorescent label used with forward primer

**Appendix B. Multiplex PCR conditions<sup>a</sup>**

| <b>1</b>           |              | <b>2 (3)<sup>b</sup></b> |              | <b>3 (2)</b> |              | <b>4 (Pit1-6B6)</b> |              |
|--------------------|--------------|--------------------------|--------------|--------------|--------------|---------------------|--------------|
| DNA                | 0.750        | DNA                      | 0.750        | DNA          | 0.750        | DNA                 | 0.750        |
| Water              | 3.710        | Water                    | 4.500        | Water        | 4.120        | Water               | 2.400        |
| 10X                | 1.000        | 10X                      | 1.000        | 10X          | 1.000        | 10X                 | 1.000        |
| MA <sup>c</sup>    | 1.000        | MA                       | 1.000        | MA           | 1.000        | MA                  | 1.000        |
| BMS1172            | 0.200        | BM17132                  | 0.125        | BM4440       | 0.070        | BMS941              | 0.200        |
| BMS2639            | 0.120        | BM2113                   | 0.100        | BM1905       | 0.070        | BMS460              | 0.200        |
| BMS410             | 0.175        | BMS527                   | 0.150        | BM720        | 0.400        | BM3507              | 0.400        |
| RM372              | 0.150        | BMS510                   | 0.100        | BM1706       | 0.125        | BM4307              | 0.300        |
| BMS1862            | 0.075        |                          | -            |              | -            | BM1225              | 0.200        |
| BMS1117            | 0.150        |                          | -            |              | -            | BMS742              | 0.200        |
| DNTP               | 0.500        | dNTP                     | 0.500        | dNTP         | 0.500        | dNTP                | 0.500        |
| 25mM Mg            | 1.200        | 25mM Mg                  | 1.200        | 25mM Mg      | 1.200        | 25mM Mg             | 1.200        |
| Taq                | <u>0.100</u> | Taq                      | <u>0.100</u> | Taq          | <u>0.100</u> | Taq                 | <u>0.150</u> |
| Total              | 10           | Total                    | 10           | Total        | 10           | Total               | 10           |
| TP <sup>d</sup> -A |              | TP-A                     |              | TP-A         |              | TP-A                |              |
| <b>5</b>           |              | <b>6</b>                 |              | <b>7</b>     |              | <b>8</b>            |              |
| DNA                | 0.750        | DNA                      | 0.750        | DNA          | 0.750        | DNA                 | 0.750        |
| Water              | 1.000        | Water                    | 1.400        | Water        | 1.450        | Water               | 4.650        |
| 10X                | 0.500        | 10X                      | 0.500        | 10X          | 0.500        | 10X                 | 1.000        |
| MA                 | 0.500        | MA                       | 0.500        | MA           | 0.500        | MA                  | 1.000        |
| BMS903             | 0.150        | BMC1410                  | 0.075        | TGLA57       | 0.050        | RM500               | 0.300        |
| BMS1128            | 0.150        | BMS3005                  | 0.150        | BM4602       | 0.100        | TGLA227             | 0.300        |
| BMS2573            | 0.075        | BM9248                   | 0.125        | BMS585       | 0.075        |                     | -            |
| BMS1116            | 0.050        | BMS2614                  | 0.100        | CSSM46       | 0.200        |                     | -            |
| BMS555             | 0.100        |                          | -            |              | -            |                     | -            |
| CSSM36             | 0.050        |                          | -            |              | -            |                     | -            |
| dNTP               | 0.250        | dNTP                     | 0.250        | dNTP         | 0.250        | dNTP                | 0.500        |
| 25mM Mg            | 0.750        | 25mM Mg                  | 0.600        | 25mM Mg      | 0.600        | 25mM Mg             | 0.800        |
| Taq                | <u>0.100</u> | Taq                      | <u>0.100</u> | Taq          | <u>0.100</u> | Taq                 | <u>0.100</u> |
| Total              | 5            | Total                    | 5            | Total        | 5            | Total               | 10           |
| TP-B               |              | TP-A                     |              | TP-A         |              | TP-A                |              |
| <b>9</b>           |              | <b>10</b>                |              | <b>11</b>    |              | <b>12</b>           |              |
| DNA                | 0.750        | DNA                      | 0.750        | DNA          | 0.750        | DNA                 | 0.750        |
| Water              | 0.950        | Water                    | 1.910        | Water        | 0.640        | Water               | 3.550        |
| 10X                | 0.500        | 10X                      | 0.500        | 10X          | 0.500        | 10X                 | 1.000        |
| MA                 | 0.500        | MA                       | 0.250        | MA           | 0.250        | MA                  | 1.000        |
| BM4513             | 0.050        | BMS2533                  | 0.120        | BMS2270      | 0.075        | BMS360              | 0.200        |
| BMS947             | 0.200        | BM4311                   | 0.075        | BMS2142      | 0.100        | BMS2258             | 0.150        |
| AGLA29             | 0.200        | BM6017                   | 0.150        | BMS434       | 0.130        | BMS2269             | 0.100        |
| TGLA49             | 0.100        |                          | -            | BMS4008      | 0.200        | BMS1979             | 0.250        |
| BM6438             | 0.125        |                          | -            | BMS1716      | 0.150        | BM1824              | 0.250        |
|                    | -            |                          | -            | BM6507       | 0.075        |                     | -            |
|                    | -            |                          | -            | BMS2809      | 0.150        |                     | -            |
|                    | -            |                          | -            | HUJ246       | 0.075        |                     | -            |
| dNTP               | 0.250        | dNTP                     | 0.250        | dNTP         | 0.250        | dNTP                | 0.500        |

|         |              |         |              |         |              |         |              |
|---------|--------------|---------|--------------|---------|--------------|---------|--------------|
| 25mM Mg | 0.600        | 25mM Mg | 0.600        | 25mM Mg | 0.650        | 25mM Mg | 1.200        |
| Taq     | <u>0.100</u> | Taq     | <u>0.050</u> | Taq     | <u>0.050</u> | Taq     | <u>0.100</u> |
| Total   | 5            | Total   | 5            | Total   | 5            | Total   | 10           |
| TP-A    |              | TP-A    |              | TP-A    |              | TP-C    |              |

| <b>13 (15)</b> |              | <b>14</b> |              | <b>15 (13)</b> |              | <b>16</b> |              |
|----------------|--------------|-----------|--------------|----------------|--------------|-----------|--------------|
| DNA            | 0.750        | DNA       | 0.750        | DNA            | 0.750        | DNA       | 0.750        |
| Water          | 3.850        | Water     | 1.250        | Water          | 2.950        | Water     | 1.200        |
| 10X            | 1.000        | 10X       | 0.500        | 10X            | 1.000        | 10X       | 0.500        |
| DMSO           | 1.000        | MA        | 0.250        | MA             | 1.000        | MA        | 0.500        |
| BM2934         | 0.300        | IL4       | 0.125        | BMS419         | 0.300        | BMS4040   | 0.075        |
| BMS827         | 0.150        | BMS614    | 0.080        | BMS130         | 0.300        | BMS2684   | 0.075        |
| BM3517         | 0.150        | BMS2047   | 0.080        | BM7169         | 0.250        | BMS2213   | 0.075        |
| BM8124         | 0.200        | BMS4031   | 0.280        | BMC701         | 0.400        | BMC1009   | 0.075        |
| -              | -            | BMS820    | 0.125        | -              | -            | BMS2349   | 0.150        |
| -              | -            | BMS1967   | 0.035        | -              | -            | INRA120   | 0.125        |
| dNTP           | 0.500        | dNTP      | 0.250        | dNTP           | 0.500        | dNTP      | 0.250        |
| 25mM Mg        | 1.200        | 25mM Mg   | 0.500        | 25mM Mg        | 1.200        | 25mM Mg   | 0.600        |
| Taq            | <u>0.100</u> | Taq       | <u>0.050</u> | Taq            | <u>0.100</u> | Taq       | <u>0.050</u> |
| Total          | 10           | Total     | 5            | Total          | 10           | Total     | 5            |
| TP-C           |              | TP-A      |              | TP-C           |              | TP-B      |              |

| <b>17</b> |              | <b>18</b> |              | <b>19</b> |              | <b>20</b> |              |
|-----------|--------------|-----------|--------------|-----------|--------------|-----------|--------------|
| DNA       | 0.750        | DNA       | 0.750        | DNA       | 0.750        | DNA       | 0.750        |
| Water     | 0.625        | Water     | 0.245        | Water     | 1.045        | Water     | 1.010        |
| 10X       | 0.500        | 10X       | 0.500        | 10X       | 0.500        | 10X       | 0.500        |
| MA        | 0.500        | MA        | 0.500        | MA        | 0.500        | MA        | 0.500        |
| BMS1675   | 0.075        | BM4028    | 0.220        | BMS1095   | 0.080        | BM2078    | 0.125        |
| BMS466    | 0.100        | BMS528    | 0.050        | BMS2055   | 0.200        | BMS1004   | 0.220        |
| BM121     | 0.150        | BMS610    | 0.110        | ILSTS008  | 0.100        | BMS1857   | 0.200        |
| BMS1743   | 0.100        | BMS574    | 0.100        | SPS113    | 0.050        | BMS1353   | 0.125        |
| BM757     | 0.100        | INRA194   | 0.230        | RM185     | 0.200        | -         | -            |
| CSSM22    | 0.175        | ILSTS035  | 0.11         | BMC4214   | 0.060        | -         | -            |
| OCAM      | 0.150        | CSSM43    | 0.22         | -         | -            | -         | -            |
| dNTP      | 0.250        | dNTP      | 0.250        | dNTP      | 0.250        | dNTP      | 0.250        |
| 25mM Mg   | 0.600        | 25mM Mg   | 0.600        | 25mM Mg   | 0.500        | 25mM Mg   | 0.600        |
| Taq       | <u>0.075</u> | Taq       | <u>0.075</u> | Taq       | <u>0.075</u> | Taq       | <u>0.050</u> |
| Total     | 5            | Total     | 5            | Total     | 5            | Total     | 5            |
| TP-B      |              | TP-A      |              | TP-A      |              | TP-A      |              |

| <b>21</b> |       | <b>22</b> |       | <b>23</b> |       | <b>24 (25)</b> |       |
|-----------|-------|-----------|-------|-----------|-------|----------------|-------|
| DNA       | 0.750 | DNA       | 0.750 | DNA       | 0.750 | DNA            | 0.750 |
| Water     | 0.305 | Water     | 1.065 | Water     | 1.085 | Water          | 0.595 |
| 10X       | 0.500 | 10X       | 0.500 | 10X       | 0.500 | 10X            | 0.500 |
| MA        | 0.500 | MA        | 0.500 | MA        | 0.500 | MA             | 0.500 |
| BM7145    | 0.130 | BM2607    | 0.090 | BM47      | 0.100 | BMS2172        | 0.200 |
| BMS2295   | 0.130 | CSSM42    | 0.150 | BM7228    | 0.200 | BM4102         | 0.090 |
| BMS803    | 0.060 | BMS1315   | 0.090 | ILSTS102  | 0.050 | BMS2072        | 0.300 |
| BMS2321   | 0.200 | ETH121    | 0.200 | BM1862    | 0.120 | ILSTS095       | 0.150 |
| BMS2      | 0.150 | XBM38     | 0.100 | BM737     | 0.150 | BM1818         | 0.175 |

|         |              |         |              |         |              |         |              |
|---------|--------------|---------|--------------|---------|--------------|---------|--------------|
| BM4107  | 0.090        | -       | -            | -       | -            | -       | -            |
| CSN3    | 0.300        | -       | -            | -       | -            | -       | -            |
| dNTP    | 0.250        | dNTP    | 0.250        | dNTP    | 0.250        | dNTP    | 0.250        |
| 25mM Mg | 0.500        | 25mM Mg | 0.600        | 25mM Mg | 0.600        | 25mM Mg | 0.500        |
| Taq     | <u>0.075</u> | Taq     | <u>0.075</u> | Taq     | <u>0.075</u> | Taq     | <u>0.075</u> |
| Total   | 5            | Total   | 5            | Total   | 5            | Total   | 5            |
| TP-A    |              | TP-A    |              | TP-B    |              | TP-B    |              |

| <b>25 (24)</b> |              | <b>26 (27)</b> |              | <b>27 (26)</b> |              | <b>28 (29, 30)</b> |              |
|----------------|--------------|----------------|--------------|----------------|--------------|--------------------|--------------|
| DNA            | 0.750        | DNA            | 0.075        | DNA            | 0.750        | DNA                | 0.750        |
| Water          | 1.275        | Water          | 1.595        | Water          | 2.005        | Water              | 1.945        |
| 10X            | 0.500        | 10X            | 0.500        | 10X            | 0.500        | 10X                | 0.500        |
| MA             | 0.500        | MA             | 0.500        | MA             | 0.500        | MA                 | 0.500        |
| BMS1322        | 0.100        | BM3509         | 0.140        | BL1103         | 0.070        | INRA006            | 0.100        |
| BMS2137        | 0.100        | INRA037        | 0.100        | INRA133        | 0.050        | BL25               | 0.090        |
| AGLA232        | 0.075        | BMS1724        | 0.050        | HUJII77        | 0.040        |                    | -            |
| IDVGA52        | 0.300        | BMS 2460       | 0.075        |                | -            |                    | -            |
| dNTP           | 0.250        | dNTP           | 0.250        | dNTP           | 0.250        | dNTP               | 0.250        |
| 25mM Mg        | 0.500        | 25mM Mg        | 0.600        | 25mM Mg        | 0.600        | 25mM Mg            | 0.600        |
| Taq            | <u>0.075</u> | Taq            | <u>0.075</u> | Taq            | <u>0.075</u> | Taq                | <u>0.075</u> |
| Total          | 5            | Total          | 5            | Total          | 5            | Total              | 5            |
| TP-B           |              | TP-A           |              | TP-A           |              | TP-A               |              |

| <b>29 (28,30)</b> |              | <b>30 (28,29)</b> |              | <b>31 (BMS648)</b> |              | <b>32</b> |              |
|-------------------|--------------|-------------------|--------------|--------------------|--------------|-----------|--------------|
| DNA               | 0.750        | DNA               | 0.750        | DNA                | 0.750        | DNA       | 0.750        |
| Water             | 1.925        | Water             | 1.565        | Water              | 1.345        | Water     | 1.635        |
| 10X               | 0.500        | 10X               | 0.500        | 10X                | 0.500        | 10X       | 0.500        |
| MA                | 0.500        | MA                | 0.500        | MA                 | 0.500        | MA        | 0.500        |
| ILSTS036          | 0.100        | BM188             | 0.200        | BMS2508            | 0.100        | BM4129    | 0.075        |
| BM103             | 0.050        | BMS47             | 0.080        | TEXAN2             | 0.150        | BMS975    | 0.120        |
| BP2               | 0.050        | BL1036            | 0.100        | BMS1355            | 0.080        | BMS1001   | 0.075        |
|                   | -            |                   | -            | INRA003            | 0.080        | RM150     | 0.075        |
|                   | -            |                   | -            | BMS601             | 0.080        |           | -            |
| dNTP              | 0.250        | dNTP              | 0.250        | dNTP               | 0.250        | dNTP      | 0.250        |
| 25mM Mg           | 0.600        | 25mM Mg           | 0.600        | 25mM Mg            | 0.600        | 25mM Mg   | 0.600        |
| Taq               | <u>0.075</u> | Taq               | <u>0.075</u> | Taq                | <u>0.075</u> | Taq       | <u>0.075</u> |
| Total             | 5            | Total             | 5            | Total              | 5            | Total     | 5            |
| TP-A              |              | TP-A              |              | TP-A               |              | TP-A      |              |

| <b>33 (50)</b> |       | <b>34</b> |       | <b>35 (36)</b> |       | <b>36 (35)</b> |       |
|----------------|-------|-----------|-------|----------------|-------|----------------|-------|
| DNA            | 0.750 | DNA       | 0.750 | DNA            | 0.750 | DNA            | 0.750 |
| Water          | 1.215 | Water     | 1.385 | Water          | 1.505 | Water          | 1.675 |
| 10X            | 0.500 | 10X       | 0.500 | 10X            | 0.500 | 10X            | 0.500 |
| MA             | 0.500 | MA        | 0.500 | MA             | 0.500 | MA             | 0.500 |
| RM044          | 0.180 | IDVGA29   | 0.130 | RM326          | 0.100 | BMS1747        | 0.075 |
| URB011         | 0.120 | BMS2571   | 0.040 | BMS468         | 0.175 | BMS4037        | 0.250 |
| BM4005         | 0.175 | BMS2024   | 0.250 | BMS3024        | 0.075 |                | -     |
| BMS2904        | 0.080 | BM4621    | 0.050 | BM711          | 0.060 |                | -     |
| dNTP           | 0.250 | dNTP      | 0.250 | dNTP           | 0.250 | dNTP           | 0.250 |
| 25mM Mg        | 0.600 | 25mM Mg   | 0.600 | 25mM Mg        | 0.600 | 25mM Mg        | 0.600 |

|       |              |       |              |       |              |       |              |
|-------|--------------|-------|--------------|-------|--------------|-------|--------------|
| Taq   | <u>0.075</u> | Taq   | <u>0.075</u> | Taq   | <u>0.075</u> | Taq   | <u>0.075</u> |
| Total | 5            | Total | 5            | Total | 5            | Total | 5            |
| TP-A  |              | TP-A  |              | TP-D  |              | TP-D  |              |

|           |              |           |              |           |              |           |              |
|-----------|--------------|-----------|--------------|-----------|--------------|-----------|--------------|
| <b>38</b> |              | <b>40</b> |              | <b>42</b> |              | <b>43</b> |              |
| DNA       | 0.750        | DNA       | 0.750        | DNA       | 0.750        | DNA       | 0.750        |
| Water     | 1.375        | Water     | 1.665        | Water     | 1.525        | Water     | 1.575        |
| 10X       | 0.500        | 10X       | 0.500        | 10X       | 0.500        | 10X       | 0.500        |
| MA        | 0.500        | MA        | 0.500        | MA        | 0.500        | MA        | 0.500        |
| BM1329    | 0.080        | BM1853*   | 0.090        | MCM74     | 0.100        | PRL2      | 0.125        |
| BM1223    | 0.080        | BMS745*   | 0.070        | BM7233    | 0.100        | BMS4023   | 0.100        |
| BMS4015   | 0.150        | BM723     | 0.070        | BM6506    | 0.080        | BM6444    | 0.080        |
| BMS1788   | 0.075        | BMS963*   | 0.100        | BMS1074   | 0.090        | TCRB      | 0.070        |
| ILSTS045  | 0.090        | -         | -            | BMS911    | 0.080        | -         | -            |
| dNTP      | 0.250        | dNTP      | 0.250        | dNTP      | 0.250        | dNTP      | 0.250        |
| 25mM Mg   | 0.600        | 25mM Mg   | 0.600        | 25mM Mg   | 0.500        | 25mM Mg   | 0.600        |
| Taq       | <u>0.075</u> | Taq       | <u>0.075</u> | Taq       | <u>0.075</u> | Taq       | <u>0.075</u> |
| Total     | 5            | Total     | 5            | Total     | 5            | Total     | 5            |
| TP-A      |              | TP-A      |              | TP-A      |              | TP-A      |              |

|           |              |           |              |           |              |           |              |
|-----------|--------------|-----------|--------------|-----------|--------------|-----------|--------------|
| <b>44</b> |              | <b>45</b> |              | <b>46</b> |              | <b>47</b> |              |
| DNA       | 0.750        | DNA       | 0.750        | DNA       | 0.750        | DNA       | 0.750        |
| Water     | 1.685        | Water     | 1.945        | Water     | 1.805        | Water     | 1.345        |
| 10X       | 0.500        | 10X       | 0.500        | 10X       | 0.500        | 10X       | 0.500        |
| MA        | 0.500        | MA        | 0.500        | MA        | 0.500        | MA        | 0.500        |
| BMS4028   | 0.080        | BMS599    | 0.080        | BM7225    | 0.080        | RM041     | 0.100        |
| BM8139    | 0.120        | BMS1789*  | 0.060        | CSSM54    | 0.060        | INRA072   | 0.120        |
| MILSTS080 | 0.120        | BM864     | 0.100        | BMS896    | 0.050        | RM065     | 0.100        |
| -         | -            | -         | -            | BM2808    | 0.070        | BMS1840   | 0.080        |
| -         | -            | -         | -            | -         | -            | BMS1237   | 0.090        |
| dNTP      | 0.250        | dNTP      | 0.250        | dNTP      | 0.250        | dNTP      | 0.250        |
| 25mM Mg   | 0.600        | 25mM Mg   | 0.500        | 25mM Mg   | 0.600        | 25mM Mg   | 0.600        |
| Taq       | <u>0.075</u> | Taq       | <u>0.075</u> | Taq       | <u>0.075</u> | Taq       | <u>0.075</u> |
| Total     | 5            | Total     | 5            | Total     | 5            | Total     | 5            |
| TP-A      |              | TP-A      |              | TP-B      |              | TP-B      |              |

|                |              |                |              |                |              |                |              |
|----------------|--------------|----------------|--------------|----------------|--------------|----------------|--------------|
| <b>48 (49)</b> |              | <b>49 (48)</b> |              | <b>50 (33)</b> |              | <b>51 (52)</b> |              |
| DNA            | 0.750        | DNA            | 0.750        | DNA            | 0.750        | DNA            | 0.750        |
| Water          | 1.885        | Water          | 1.325        | Water          | 1.865        | Water          | 1.525        |
| 10X            | 0.500        | 10X            | 0.500        | 10X            | 0.500        | 10X            | 0.500        |
| MA             | 0.500        | MA             | 0.500        | MA             | 0.500        | MA             | 0.500        |
| RM3            | 0.180        | ARO28          | 0.200        | BMS2145        | 0.040        | BM6438.29      | 0.200        |
| TGLA44         | 0.040        | INRA040        | 0.300        | URB042         | 0.190        | IGF1           | 0.200        |
| dNTP           | 0.250        | dNTP           | 0.250        | dNTP           | 0.250        | dNTP           | 0.250        |
| 25mM Mg        | 0.600        |
| Taq            | <u>0.075</u> | Taq            | <u>0.075</u> | Taq            | <u>0.075</u> | Taq            | <u>0.075</u> |
| Total          | 5            | Total          | 5            | Total          | 5            | Total          | 5            |
| TP-B           |              | TP-E           |              | TP-B           |              | TP-A           |              |

|                |  |           |  |           |  |           |  |
|----------------|--|-----------|--|-----------|--|-----------|--|
| <b>52 (51)</b> |  | <b>55</b> |  | <b>56</b> |  | <b>57</b> |  |
|----------------|--|-----------|--|-----------|--|-----------|--|

|         |              |         |              |          |              |          |              |
|---------|--------------|---------|--------------|----------|--------------|----------|--------------|
| DNA     | 0.750        | DNA     | 0.750        | DNA      | 0.750        | DNA      | 0.750        |
| Water   | 1.765        | Water   | 1.815        | Water    | 1.745        | Water    | 1.985        |
| 10X     | 0.500        | 10X     | 0.500        | 10X      | 0.500        | 10X      | 0.500        |
| MA      | 0.500        | MA      | 0.500        | MA       | 0.500        | MA       | 0.500        |
| BMS353  | 0.085        | RM088   | 0.090        | BMS2076* | 0.080        | ILSTS030 | 0.090        |
| BMC3224 | 0.045        | BMS2319 | 0.050        | BMS650*  | 0.080        | ILSTS050 | 0.080        |
| TGLA53  | 0.150        | RM094   | 0.070        | BMS1787* | 0.060        |          | -            |
|         | -            | BMC4203 | 0.045        | CSSM34   | 0.070        |          | -            |
| dNTP    | 0.250        | dNTP    | 0.250        | dNTP     | 0.250        | dNTP     | 0.250        |
| 25mM Mg | 0.600        | 25mM Mg | 0.600        | 25mM Mg  | 0.600        | 25mM Mg  | 0.600        |
| Taq     | <u>0.075</u> | Taq     | <u>0.075</u> | Taq      | <u>0.075</u> | Taq      | <u>0.075</u> |
| Total   | 5            | Total   | 5            | Total    | 5            | Total    | 5            |
| TP-B    |              | TP-F    |              | TP-F     |              | TP-B     |              |

**58****91 (INRA117)****92****93**

|         |              |          |              |         |              |         |              |
|---------|--------------|----------|--------------|---------|--------------|---------|--------------|
| DNA     | 0.750        | DNA      | 0.750        | DNA     | 0.750        | DNA     | 0.750        |
| Water   | 1.625        | Water    | 2.025        | Water   | 1.825        | Water   | 1.505        |
| 10X     | 0.500        | 10X      | 0.500        | 10X     | 0.500        | 10X     | 0.500        |
| MA      | 0.500        | MA       | 0.500        | MA      | 0.500        | MA      | 0.500        |
| BM1558  | 0.100        | RM103    | 0.100        | BMS4017 | 0.150        | INRA119 | 0.130        |
| ETH225* | 0.090        | ILSTS065 | 0.1          | BM9146  | 0.075        | BM1314  | 0.130        |
| CSSM26  | 0.060        |          | -            | BMS4019 | 0.075        | AGLA17  | 0.150        |
| CSSM65  | 0.100        |          | -            |         | -            |         | -            |
| dNTP    | 0.250        | dNTP     | 0.250        | dNTP    | 0.250        | dNTP    | 0.250        |
| 25mM Mg | 0.600        | 25mM Mg  | 0.500        | 25mM Mg | 0.500        | 25mM Mg | 0.600        |
| Taq     | <u>0.075</u> | Taq      | <u>0.075</u> | Taq     | <u>0.075</u> | Taq     | <u>0.075</u> |
| Total   | 5            | Total    | 5            | Total   | 5            | Total   | 5            |
| TP-F    |              | TP-E     |              | TP-A    |              | TP-A    |              |

**94****100****101****102**

|         |              |         |              |          |              |          |              |
|---------|--------------|---------|--------------|----------|--------------|----------|--------------|
| DNA     | 0.750        | DNA     | 0.750        | DNA      | 0.750        | DNA      | 0.750        |
| Water   | 1.725        | Water   | 0.930        | Water    | 0.180        | Water    | 1.040        |
| 10X     | 0.500        | 10X     | 0.625        | 10X      | 0.625        | 10X      | 0.625        |
| MA      | 0.500        | MA      | 0.500        | MA       | 0.500        | MA       | 0.500        |
| HELL11  | 0.200        | BMS2252 | 0.100        | RM096    | 0.060        | RM327    | 0.080        |
| BMS651  | 0.100        | INRA122 | 0.200        | BM7109   | 0.110        | BM1233   | 0.080        |
|         | -            | BM3412  | 0.075        | INRA071  | 0.100        | ADCY2    | 0.170        |
|         | -            | BL37    | 0.200        | BM875    | 0.250        | BMS1352* | 0.070        |
|         | -            | BMS2724 | 0.060        | IDVGA3   | 0.110        | BMC1207* | 0.070        |
|         | -            |         | -            | BRN      | 0.220        | BM4006   | 0.110        |
|         | -            |         | -            | BMS2325* | 0.090        |          | -            |
|         | -            |         | -            | BM9065*  | 0.070        |          | -            |
| dNTP    | 0.250        | dNTP    | 0.250        | dNTP     | 0.250        | dNTP     | 0.250        |
| 25mM Mg | 0.600        | 25mM Mg | 0.600        | 25mM Mg  | 0.600        | 25mM Mg  | 0.600        |
| Taq     | <u>0.075</u> | Taq     | <u>0.075</u> | Taq      | <u>0.075</u> | Taq      | <u>0.075</u> |
| Total   | 5            | Total   | 5            | Total    | 5            | Total    | 5            |
| TP-E    |              | TP-A    |              | TP-A     |              | TP-A     |              |

**103****104****105****106**

|     |       |     |       |     |       |     |       |
|-----|-------|-----|-------|-----|-------|-----|-------|
| DNA | 0.750 | DNA | 0.750 | DNA | 0.750 | DNA | 0.750 |
|-----|-------|-----|-------|-----|-------|-----|-------|

|         |              |         |              |          |              |         |              |
|---------|--------------|---------|--------------|----------|--------------|---------|--------------|
| Water   | 0.640        | Water   | 1.385        | Water    | 0.410        | Water   | 1.305        |
| 10X     | 0.625        | 10X     | 0.500        | 10X      | 0.625        | 10X     | 0.500        |
| MA      | 0.500        | MA      | 0.500        | MA       | 0.500        | MA      | 0.500        |
| BMS875  | 0.070        | BMS2116 | 0.110        | BM6105   | 0.050        | HEL1    | 0.150        |
| RM404*  | 0.080        | HUJ616  | 0.100        | BMS1248  | 0.070        | BMS678  | 0.060        |
| BMS1316 | 0.100        | ETH152  | 0.100        | BMS1244  | 0.240        | BMS2361 | 0.080        |
| BM3628  | 0.100        | BMS1926 | 0.060        | BMS1600  | 0.220        | BMS518  | 0.100        |
| BL1100  | 0.070        | BMS429* | 0.100        | BMS2847  | 0.085        | BMS2057 | 0.050        |
| RM040   | 0.090        | -       | -            | BMS2377* | 0.050        | BM7160  | 0.070        |
| BMS2567 | 0.150        | -       | -            | BMC6020* | 0.060        | -       | -            |
| CYP21   | 0.120        | -       | -            | INRA048  | 0.120        | -       | -            |
| dNTP    | 0.250        | dNTP    | 0.250        | dNTP     | 0.250        | dNTP    | 0.250        |
| 25mM Mg | 0.600        | 25mM Mg | 0.600        | 25mM Mg  | 0.600        | 25mM Mg | 0.600        |
| Taq     | <u>0.075</u> | Taq     | <u>0.075</u> | Taq      | <u>0.075</u> | Taq     | <u>0.075</u> |
| Total   | 5            | Total   | 5            | Total    | 5            | Total   | 5            |
| TP-A    |              | TP-A    |              | TP-A     |              | TP-A    |              |

| <b>107</b> |              | <b>108</b> |              | <b>109</b> |              | <b>110</b> |              |
|------------|--------------|------------|--------------|------------|--------------|------------|--------------|
| DNA        | 0.750        | DNA        | 0.750        | DNA        | 0.750        | DNA        | 0.750        |
| Water      | 0.740        | Water      | 1.240        | Water      | 0.920        | Water      | 1.725        |
| 10X        | 0.625        | 10X        | 0.625        | 10X        | 0.625        | 10X        | 0.500        |
| MA         | 0.500        | MA         | 0.500        | MA         | 0.500        | MA         | 0.500        |
| BL1043     | 0.050        | BMS817     | 0.150        | BM9202     | 0.090        | BMS2557    | 0.120        |
| BMS2608    | 0.050        | BM49       | 0.090        | BM1443     | 0.120        | BMS1348    | 0.080        |
| AGLA269    | 0.220        | BMS2526    | 0.090        | BL1071     | 0.220        | BMS713     | 0.100        |
| BMS1948    | 0.100        | BMS812*    | 0.050        | BMS2742    | 0.060        | -          | -            |
| BMS1282    | 0.060        | IDVGA49    | 0.100        | RM66       | 0.090        | -          | -            |
| ANP1       | 0.120        | -          | -            | BMS1714*   | 0.060        | -          | -            |
| BMS108*    | 0.080        | -          | -            | -          | -            | -          | -            |
| BM2504     | 0.050        | -          | -            | -          | -            | -          | -            |
| dNTP       | 0.250        | dNTP       | 0.250        | dNTP       | 0.250        | dNTP       | 0.250        |
| 25mM Mg    | 0.600        |
| Taq        | <u>0.075</u> | Taq        | <u>0.075</u> | Taq        | <u>0.075</u> | Taq        | <u>0.075</u> |
| Total      | 5            | Total      | 5            | Total      | 5            | Total      | 5            |
| TP-A       |              | TP-A       |              | TP-A       |              | TP-A       |              |

| <b>111</b> |              | <b>112</b> |              | <b>113</b> |              | <b>114</b> |              |
|------------|--------------|------------|--------------|------------|--------------|------------|--------------|
| DNA        | 0.750        | DNA        | 0.750        | DNA        | 0.750        | DNA        | 0.750        |
| Water      | 1.200        | Water      | 1.280        | Water      | 1.605        | Water      | 1.700        |
| 10X        | 0.625        | 10X        | 0.625        | 10X        | 0.500        | 10X        | 0.625        |
| MA         | 0.500        | MA         | 0.500        | MA         | 0.500        | MA         | 0.500        |
| BMS1658    | 0.200        | TGLA337    | 0.090        | BM4117     | 0.090        | JAB8       | 0.050        |
| RM151      | 0.050        | BM8125     | 0.090        | BMS356     | 0.070        | OARVH998   | 0.200        |
| BM4208     | 0.050        | BM804      | 0.080        | BMS2267    | 0.050        | -          | -            |
| BMS2461    | 0.200        | INRA134    | 0.050        | BMS2519    | 0.150        | -          | -            |
| -          | -            | BM6026     | 0.150        | -          | -            | -          | -            |
| dNTP       | 0.250        | dNTP       | 0.250        | dNTP       | 0.250        | dNTP       | 0.250        |
| 25mM Mg    | 0.600        |
| Taq        | <u>0.075</u> | Taq        | <u>0.075</u> | Taq        | <u>0.075</u> | Taq        | <u>0.075</u> |
| Total      | 5            | Total      | 5            | Total      | 5            | Total      | 5            |
| TP-A       |              | TP-A       |              | TP-A       |              | TP-A       |              |

| <b>120</b> |              | <b>122</b> |              | <b>123 (124)</b> |              | <b>124 (123)</b> |              |
|------------|--------------|------------|--------------|------------------|--------------|------------------|--------------|
| DNA        | 0.750        | DNA        | 0.750        | DNA              | 0.750        | DNA              | 0.750        |
| Water      | 1.585        | Water      | 1.680        | Water            | 1.960        | Water            | 1.700        |
| 10X        | 0.500        | 10X        | 0.625        | 10X              | 0.625        | 10X              | 0.625        |
| MA         | 0.500        | MA         | 0.500        | MA               | 0.500        | MA               | 0.500        |
| UWCA1      | 0.100        | RM011      | 0.090        | AF5(L6038)       | 0.060        | BMC1222          | 0.130        |
| BM9067     | 0.110        | BMS1069    | 0.040        | BMS1864          | 0.060        | BM8118           | 0.120        |
| RM186      | 0.070        | BM6466     | 0.050        |                  | -            |                  | -            |
| RM388      | 0.090        | BL1029     | 0.080        |                  | -            |                  | -            |
| dNTP       | 0.250        | dNTP       | 0.250        | dNTP             | 0.250        | dNTP             | 0.250        |
| 25mM Mg    | 0.600        | 25mM Mg    | 0.600        | 25mM Mg          | 0.600        | 25mM Mg          | 0.600        |
| Taq        | <u>0.075</u> | Taq        | <u>0.075</u> | Taq              | <u>0.075</u> | Taq              | <u>0.075</u> |
| Total      | 5            | Total      | 5            | Total            | 5            | Total            | 5            |
| TP-G       |              | TP-A       |              | TP-A             |              | TP-A             |              |

| <b>126</b> |              | <b>127</b> |              | <b>128</b> |              | <b>130</b> |              |
|------------|--------------|------------|--------------|------------|--------------|------------|--------------|
| DNA        | 0.750        | DNA        | 0.750        | DNA        | 0.750        | DNA        | 0.750        |
| Water      | 1.285        | Water      | 1.505        | Water      | 1.545        | Water      | 1.705        |
| 10X        | 0.500        | 10X        | 0.500        | 10X        | 0.500        | 10X        | 0.500        |
| MA         | 0.500        | MA         | 0.500        | MA         | 0.500        | MA         | 0.500        |
| BOLADRB1   | 0.150        | BM305      | 0.090        | BMS1167    | 0.090        | BMS1825    | 0.090        |
| LEP        | 0.180        | ILSTS018   | 0.100        | BM4325     | 0.200        | RM338      | 0.100        |
| PTH        | 0.100        | BMS868     | 0.120        | BM8115     | 0.100        | INRA5      | 0.120        |
| BOLADRB2   | 0.090        | CSSM31     | 0.100        |            | -            |            | -            |
| dNTP       | 0.250        | dNTP       | 0.250        | dNTP       | 0.250        | dNTP       | 0.250        |
| 25mM Mg    | 0.600        |
| Taq        | <u>0.075</u> | Taq        | <u>0.075</u> | Taq        | <u>0.075</u> | Taq        | <u>0.075</u> |
| Total      | 5            | Total      | 5            | Total      | 5            | Total      | 5            |
| TP-E       |              | TP-A       |              | TP-A       |              | TP-A       |              |

| <b>131</b> |              | <b>132</b> |              | <b>133</b> |              | <b>AGLA13<br/>(BR6504)</b> |              |
|------------|--------------|------------|--------------|------------|--------------|----------------------------|--------------|
| DNA        | 0.750        | DNA        | 0.750        | DNA        | 0.750        | DNA                        | 0.750        |
| Water      | 1.675        | Water      | 1.645        | Water      | 1.725        | Water                      | 2.125        |
| 10X        | 0.500        | 10X        | 0.500        | 10X        | 0.500        | 10X                        | 0.500        |
| MA         | 0.500        | MA         | 0.500        | MA         | 0.500        | MA                         | 0.500        |
| BMS690     | 0.100        | BM2830     | 0.090        | INRA090    | 0.250        | AGLA13                     | 0.100        |
| BMS1242    | 0.075        | BR2936     | 0.250        | BMS2034    | 0.050        |                            | -            |
| BMS382     | 0.150        |            | -            |            | -            |                            | -            |
| dNTP       | 0.250        | dNTP       | 0.250        | dNTP       | 0.250        | dNTP                       | 0.250        |
| 25mM Mg    | 0.600        | 25mM Mg    | 0.600        | 25mM Mg    | 0.600        | 25mM Mg                    | 0.600        |
| Taq        | <u>0.075</u> | Taq        | <u>0.075</u> | Taq        | <u>0.075</u> | Taq                        | <u>0.075</u> |
| Total      | 5            | Total      | 5            | Total      | 5            | Total                      | 5            |
| TP-E       |              | TP-A       |              | TP-A       |              | TP-A                       |              |

| <b>BMS1318</b> |       | <b>BMS648 (40)</b> |       | <b>BMS764</b> |       | <b>BR6504<br/>(AGLA13)</b> |       |
|----------------|-------|--------------------|-------|---------------|-------|----------------------------|-------|
| DNA            | 0.750 | DNA                | 0.750 | DNA           | 0.750 | DNA                        | 0.750 |
| Water          | 2.125 | Water              | 2.165 | Water         | 1.925 | Water                      | 1.925 |

|         |              |         |              |         |              |         |              |
|---------|--------------|---------|--------------|---------|--------------|---------|--------------|
| 10X     | 0.500        | 10X     | 0.500        | 10X     | 0.500        | 10X     | 0.500        |
| MA      | 0.500        | MA      | 0.500        | MA      | 0.500        | MA      | 0.500        |
| BMS1318 | 0.100        | BM648   | 0.080        | BMS764  | 0.200        | BR6504  | 0.200        |
| dNTP    | 0.250        | dNTP    | 0.250        | dNTP    | 0.250        | dNTP    | 0.250        |
| 25mM Mg | 0.600        |
| Taq     | <u>0.075</u> | Taq     | <u>0.075</u> | Taq     | <u>0.075</u> | Taq     | <u>0.075</u> |
| Total   | 5            | Total   | 5            | Total   | 5            | Total   | 5            |
| TP-A    |              | TP-A    |              | TP-E    |              | TP-A    |              |

| <b>Inra117 (91)</b> |              | <b>Pit1-7B7 (7)</b> |              | <b>Pit1-6B6 (4)</b> |              | <b>OARFCB11</b> |              |
|---------------------|--------------|---------------------|--------------|---------------------|--------------|-----------------|--------------|
| DNA                 | 0.750        | DNA                 | 0.750        | DNA                 | 0.750        | DNA             | 0.750        |
| Water               | 1.925        | Water               | 2.125        | Water               | 2.125        | Water           | 2.125        |
| 10X                 | 0.500        | 10X                 | 0.500        | 10X                 | 0.500        | 10X             | 0.500        |
| MA                  | 0.500        | MA                  | 0.500        | MA                  | 0.500        | MA              | 0.500        |
| Inra117             | 0.200        | Pit17b7             | 0.100        | Pit17b7             | 0.100        | OARFCB11        | 0.100        |
| dNTP                | 0.250        | dNTP                | 0.250        | dNTP                | 0.250        | DNTP            | 0.250        |
| 25mM Mg             | 0.600        | 25mM Mg             | 0.600        | 25mM Mg             | 0.600        | 25mM Mg         | 0.600        |
| Taq                 | <u>0.075</u> | Taq                 | <u>0.075</u> | Taq                 | <u>0.075</u> | Taq             | <u>0.075</u> |
| Total               | 5            | Total               | 5            | Total               | 5            | Total           | 5            |
| TP-E                |              | TP-E                |              | TP-E                |              | TP-E            |              |

- <sup>a</sup> All units are microliters (μl) and all working primer concentrations are 20 μM except those noted which are 10 μM.
- <sup>b</sup> Multiplexes or individual markers in parentheses can be co-loaded.
- <sup>c</sup> Master Amp PCR enhancer.
- <sup>d</sup> Thermal profiles listed in Appendix C.

\*

**Appendix C.** Multiplex PCR thermal profiles

A

| Temperature | Time (min) |                         |
|-------------|------------|-------------------------|
| 96°         | 3:00       |                         |
| 96°         | 0:30       | 4 cycles<br>-1.0°/cycle |
| 58°         | 0:30       |                         |
| 65°         | 1:00       |                         |
| 95°         | 0:30       | 30 cycles               |
| 54°         | 0:30       |                         |
| 65°         | 1:00       |                         |
| 65°         | 20:00      |                         |

B

| Temperature | Time (min) |                         |
|-------------|------------|-------------------------|
| 96°         | 3:00       |                         |
| 96°         | 0:30       | 3 cycles<br>-1.0°/cycle |
| 58°         | 0:30       |                         |
| 65°         | 1:0        |                         |
| 95°         | 0:30       | 30 cycles               |
| 56°         | 0:30       |                         |
| 65°         | 1:0        |                         |
| 65°         | 20:00      |                         |

C

|     |       |                         |
|-----|-------|-------------------------|
| 96° | 3:00  |                         |
| 96° | 0:30  | 3 cycles<br>-1.0°/cycle |
| 58° | 0:30  |                         |
| 65° | 1:00  |                         |
| 95° | 0:30  | 30 cycles               |
| 55° | 0:30  |                         |
| 65° | 1:00  |                         |
| 65° | 20:00 |                         |

D

|     |       |                       |
|-----|-------|-----------------------|
| 96  | 3:00  |                       |
| 96° | 0:30  | 3 cycles<br>-1°/cycle |
| 56° | 0:30  |                       |
| 65° | 1:0   |                       |
| 96° | 0:30  | 35 cycles             |
| 53° | 0:30  |                       |
| 65° | 1:0   |                       |
| 65° | 20:00 |                       |

E

|     |       |                       |
|-----|-------|-----------------------|
| 96° | 3:00  |                       |
| 96° | 0:30  | 3 cycles<br>-1°/cycle |
| 54° | 0:30  |                       |
| 65° | 1:00  |                       |
| 96° | 0:30  | 35 cycles             |
| 51° | 0:30  |                       |
| 65° | 1:00  |                       |
| 65° | 20:00 |                       |

F

|     |       |                       |
|-----|-------|-----------------------|
| 96° | 3:00  |                       |
| 96° | 0:30  | 4 cycles<br>-1°/cycle |
| 62° | 0:30  |                       |
| 65° | 1:0   |                       |
| 96° | 0:30  | 35 cycles             |
| 51° | 0:30  |                       |
| 65° | 1:0   |                       |
| 65° | 20:00 |                       |

G

|     |       |                       |
|-----|-------|-----------------------|
| 96° | 3:00  |                       |
| 96° | 0:30  | 4 cycles<br>-1°/cycle |
| 50° | 0:30  |                       |
| 65° | 1:00  |                       |
| 96° | 0:30  | 30 cycles             |
| 46° | 0:30  |                       |
| 65° | 1:00  |                       |
| 65° | 20:00 |                       |
